# Supplementary material
Source: HighWire-hosted journal article supplement (https://bmjopen.bmj.com/content/15/5/e096677)
Supplement: inline-supplementary-material-1 [file inline-supplementary-material-1.pdf]

Additional File

Page2:

Table S1 Anatomical boundaries of Chest wall/whole breast CTV

Page3-4:

Table S2 Anatomical boundaries of CTV for regional nodes

Page5:

Table S3 Tumor bed boost contours

Page6-7:

Table S4 Dosimetric coverage for target volume

Page8-9:

Table S5 Dose constraints for OARs

Page10-13:

Table S6 The ongoing trials on the one-week regimen for WBI alone and for RNI in early breast cancer

Table S1. Anatomical boundaries of chest wall and whole breast CTV

|           | Chest wall                                                                                                                                                    | Whole breast                                                                                                     |
|-----------|---------------------------------------------------------------------------------------------------------------------------------------------------------------|------------------------------------------------------------------------------------------------------------------|
| Cranial   | Guided by palpable /visible signs; if appropriate guided by the contralateral breast; maximally up to the inferior edge of the sternoclavicular joint         | Upper border of palpable /visible breast tissue; maximally up to the inferior edge of the sternoclavicular joint |
| Caudal    | Guided by palpable/visible signs; if appropriate guide by the contralateral breast                                                                            | Clinical reference; most caudal CT slice with visible breast                                                     |
| Anterior  | Skin                                                                                                                                                          | 5mm under skin surface                                                                                           |
| Posterior | Include pectoralis muscles, chest wall muscles, excluding ribs                                                                                                | Exclude pectoralis muscles, chest wall muscles, ribs                                                             |
| Lateral   | Guided by palpable/visible signs; if appropriate guide by the contralateral breast. Usually anterior to the mid-axillary line, excludes lattices dorsi muscle | Lateral breast fold; anterior to the lateral thoracic artery                                                     |
| Medial    | Lateral to the medial perforating thoracic internal vessels; maximally to the edge of the sternum                                                             | Lateral to the medial perforating thoracic internal vessels; maximally to the edge of the sternum                |

Notes: For patients with stage III according to AJCC 8<sup>th</sup> edition, the posterior of the whole breast can extend to the rib interface.

Table S2. Anatomical boundaries of regional nodal CTV

|                              | Cranial                                 | Caudal                                                                              | Anterior                                                                            | Posterior                                                                                                         | Lateral                                                                                                                             | Medial                                    |
|------------------------------|-----------------------------------------|-------------------------------------------------------------------------------------|-------------------------------------------------------------------------------------|-------------------------------------------------------------------------------------------------------------------|-------------------------------------------------------------------------------------------------------------------------------------|-------------------------------------------|
| Medial<br>Supra-clavicular   | Caudal to the cricoid cartilage         | Junction of brachioceph-axillary veins / Caudal edge of clavicle head               | Posterior edge of sternocleidomastoid muscle                                        | Posterior surface of internal carotid artery or anterior surface of scalene muscles                               | Medial border of clavicle head or 5 mm below the skin surface                                                                       | Medial border of internal carotid vessels |
| Lateral<br>Supra-clavicular* | Caudal to the cricoid cartilage         | Junction of Brachioceph. -axillary veins. /Caudal edge of clavicle head             | Posterior surface of internal carotid artery or anterior surface of scalene muscles | At the trapezius                                                                                                  | Medial border of clavicle head or 5mm below the skin surface                                                                        | At the longus coli                        |
| Internal<br>mammary          | Junction of Brachioceph-axillary veins. | Cranial side of the 4rd rib (in selected cases 5th rib)                             | Ventral limit of the vascular area                                                  | Pleura                                                                                                            | 7mm from internal mammary vessels                                                                                                   | 7mm from internal mammary vessels         |
| Axilla-level I               | Below the humeral head                  | At the point where the pectoralis major inserts on the ribs (around 4th to 5th rib) | At posterior pectoralis major & minor muscles                                       | An imaginary line anterior to the surface of latissimus dorsi muscle, subscapularis muscle and teres major muscle | Cranially up to an imaginary line between the major pectoral and deltoid muscles, and further caudal up to a line between the major | Lateral border of pectoralis minor musle  |

|                  |                                            |                                                               |                                              |                                                                               |                                          |                                                                           |  |                                   |              |  |
|------------------|--------------------------------------------|---------------------------------------------------------------|----------------------------------------------|-------------------------------------------------------------------------------|------------------------------------------|---------------------------------------------------------------------------|--|-----------------------------------|--------------|--|
|                  |                                            |                                                               |                                              |                                                                               |                                          |                                                                           |  | pectoral<br>latissimus<br>muscles | and<br>dorsi |  |
| Axilla-level II  | Insertion point of pectoralis minor muscle | The caudal border of the pectoralis minor muscle              | Pectoralis minor muscle                      | Anterior border of ribs and serratus anterior                                 | Lateral edge of pectoralis minor muscle  | Medial edge of pectoralis minor muscle                                    |  |                                   |              |  |
| Axilla-level III | Pectoralis minor muscle insert on Coracoid | Axillary vessels cross medial edge of pectoralis minor muscle | Posterior surface of pectoralis major muscle | Anterior border of ribs or posterior border of subclavian or axillary vessels | Medial border of pectoralis minor muscle | Lateral border of clavicle, ribs, junction of brachioceph-axillary veins. |  |                                   |              |  |

- Notes:
- 1) The regional nodal CTV target volume should include the medial supra-clavicular, axilla-level III, undissected axilla-level II, and internal mammary lymph nodes.
  - 2) The inclusion of axilla-level I and II in the regional nodal CTV is at the discretion of radiation oncologists based on the clinical treatment indications. The rotter’s nodes are included in the CTV target volume of axilla-level II.
  - 3) For N2, N3, or high-risk N1 patients, it is recommended to include the lateral supra-clavicular nodes in the regional nodal CTV
  - 4) When the tumor is in the inner lower quadrant, the caudal border of internal mammary nodes is recommended to extend to the cranial side of the 5th rib.

**Table S3. Tumor bed GTV and CTV contours**

|     |                                                                                           |
|-----|-------------------------------------------------------------------------------------------|
| GTV | Includes seroma and/or surgical clips                                                     |
| CTV | GTV with a margin of 1 cm in all directions and without exceeding CTV of the whole breast |

Abbreviations: GTV=gross tumor volume, CTV=clinical target volume

Table S4. Dosimetric coverage for target volume

| Target volume                                 | Requirements         |
|-----------------------------------------------|----------------------|
| PTV of chest wall/whole breast and RNI        | Per Protocol         |
|                                               | D95%>26Gy            |
|                                               | Acceptable variation |
|                                               | D90%>26Gy            |
|                                               | Per Protocol         |
|                                               | V28Gy <5%            |
| CI for PTV of chest wall/whole breast and RNI | Acceptable variation |
|                                               | V29Gy <5%            |
|                                               | Per Protocol         |
|                                               | V25Gy >99%           |
|                                               | Acceptable variation |
|                                               | V24Gy >99%           |
| Tumor bed PTV                                 | Per Protocol         |
|                                               | ≥0.95 , ≤2           |
|                                               | Acceptable variation |
|                                               | ≥0.85 , ≤2.5         |
|                                               | Per Protocol         |
|                                               | D95%>36.4Gy          |
| Tumor bed PTV                                 | Acceptable variation |
|                                               | D90%>36.4Gy          |
|                                               | Per Protocol         |
|                                               | V39Gy <5%            |
|                                               | Acceptable variation |
|                                               | V40Gy <5%            |
| Tumor bed PTV                                 | Per Protocol         |
|                                               | V35Gy >99%           |

|                      |                      |              |
|----------------------|----------------------|--------------|
| CI for Tumor bed PTV | Acceptable variation | V34Gy >99%   |
|                      | Per Protocol         | ≥0.95 , ≤2.5 |
|                      | Acceptable variation | ≥0.9 , ≤3    |

Notes:

- 1) When evaluating the treatment plan of chest wall/whole breast with RNI, tumor bed boost doses should not be considered.
- 2) CI=Conformity index, the volume covered by 95% of the prescription dose / PTV volume
- 3) For evaluation of IMRT plan: a) The whole breast CTV is expanded by 5-8mm in three dimensions to form the PTV. The PTV is limited to 5mm below the skin and the surface of the pectoral muscle or chest wall to form the whole breast PTV\_eval for IMRT plan evaluation; 2) The chest wall and regional nodal CTV is expanded by 5-8mm in three dimensions to form an integrated PTV; Limit the PTV to the skin as the anterior boundary and the chest pleura as the posterior boundary to form the PTV\_eval for plan evaluation.
- 4) For evaluation of proton plan: a) the dosimetric coverage of the CTV is evaluated; b) The chest wall CTV is recommended to retract 5mm from skin; c) If the chest wall is very thin, 3mm can be considered.

Table S5. DVH constraints for OARs

| OARs                                | The ARROW trial      |              |                      |
|-------------------------------------|----------------------|--------------|----------------------|
|                                     | Dosimetric parameter | Per protocol | Acceptable variation |
| Heart for left-sided breast cancer  | Mean                 | <3Gy         | <3.5Gy               |
|                                     | V15Gy                | <10%         | <15%                 |
|                                     | V4Gy                 | <20%         | <25%                 |
|                                     | N/A                  | N/A          | N/A                  |
| Heart for right-sided breast cancer | Mean                 | <1Gy         | <1.5Gy               |
|                                     | V2Gy                 | <15%         | <20%                 |
| Ipsilateral Lung                    | Mean                 | <7.5Gy       | <8Gy                 |
|                                     | V4Gy                 | <45%         | <50%                 |
|                                     | V10Gy                | <30%         | <35%                 |
|                                     | V15Gy                | <20%         | <23%                 |
| Contralateral lung                  | Mean                 | <1Gy         | <1.5Gy               |
|                                     | V2Gy                 | <10%         | <15%                 |
| Spinal cord                         | Max                  | <20Gy        | N/A                  |
| Ipsilateral Humeral head            | Mean                 | <10Gy        | <11Gy                |



|                      |           |        |        |
|----------------------|-----------|--------|--------|
| Contralateral breast | Mean      | <3.5Gy | <5Gy   |
| Brachial plexus      | D0.1cc    | <27Gy  | <28Gy  |
| Esophagus            | D1cc      | < 26Gy | < 27Gy |
|                      | D 0.01cc  | < 27Gy | < 28Gy |
| Thyroid              | Mean dose | < 10Gy | < 11Gy |
| Skin ring            | V2Gy      | <10%   | <15%   |

Table S6. The ongoing trials on the one-week regimen for WBI alone and for RNI in early breast cancer

| NCT Number   | Coun try | Age (years) | Start year | Random ized | Enrolled patients                                                       | Reconstru ction | Tumor bed Boost                                                              | IMNI | Study group                                                  | Control group         | Sample size | Primary Endpoint           | Status      |
|--------------|----------|-------------|------------|-------------|-------------------------------------------------------------------------|-----------------|------------------------------------------------------------------------------|------|--------------------------------------------------------------|-----------------------|-------------|----------------------------|-------------|
| WBI alone    |          |             |            |             |                                                                         |                 |                                                                              |      |                                                              |                       |             |                            |             |
| NCT0558 6256 | Italy    | 18-99       | 2021       | No          | Indicated for WBI                                                       | N/A             | Optional, SIB of 30Gy/5Fx or sequential 7.6Gy/ 2Fx                           | N/A  | 26Gy/5F x/1w                                                 | N/A                   | 300         | Acute and chronic toxicity | Recruit ing |
| NCT0531 8274 | Mexi co  | ≥18         | 2021       | Yes         | BCS, pTis-T2, N0                                                        | N/A             | Study group: No boost; Control group: SIB of 48Gy/16Fx in high risk patients | N/A  | 26Gy/5F x/1w                                                 | 42.5Gy/16 Fx          | 72          | Local control              | Recruit ing |
| NCT0466 9873 | Brazil   | 50-90       | 2021       | Yes         | BCS, unifocal disease, T < 3cm, pN0, negative LVSI, Grade 1-2, margin > | N/A             | No                                                                           | N/A  | Group1: 26Gy/5F x/1w for WBI<br>Group2: 26Gy/5F x/1w for PBI | 40Gy/15F x/3w for WBI | 36          | Local recurrence           | Recruit ing |

|             |               |     |      |     |                                                                                                       |     |                                                                                                              |                               |                                                            |                                                             |      |                                |            |
|-------------|---------------|-----|------|-----|-------------------------------------------------------------------------------------------------------|-----|--------------------------------------------------------------------------------------------------------------|-------------------------------|------------------------------------------------------------|-------------------------------------------------------------|------|--------------------------------|------------|
|             |               |     |      |     | 2mm                                                                                                   |     |                                                                                                              |                               |                                                            |                                                             |      |                                |            |
| NCT05417516 | Canada        | ≥50 | 2023 | Yes | BSC, negative margin, N0                                                                              | N/A | No                                                                                                           | N/A                           | 26Gy/5Fx/1w for PBI                                        | 26Gy/5Fx/1w for WBI                                         | 910  | Local recurrence               | Recruiting |
| RNI         |               |     |      |     |                                                                                                       |     |                                                                                                              |                               |                                                            |                                                             |      |                                |            |
| NCT03788213 | India         | ≥18 | 2019 | Yes | BCS, or after NAC, or mastectomy with pT3/T4 or pN2 or pT0-2pN0-1 with a Cambridge Score of 3 or more | Yes | Study group:SIB of 32Gy/5Fx, or sequential 12Gy/4Fx; Control group: SIB of 48Gy/15Fx, or sequential 12Gy/4Fx | Based on institutional policy | 26Gy/5Fx/1w for WBI/Chest wall, and RNI in N+ or after NAC | 40Gy/15Fx/3w for WBI/Chest wall, and RNI in N+ or after NAC | 2100 | Locoregional recurrence rate   | Recruiting |
| NCT04648904 | United States | ≥30 | 2020 | No  | mastectomy with reconstruction; pathologic T0N1a-2a, T1N1a-2a, T2N1a-2a, T3N0-2a, all                 | Yes | Optional chest wall boost of 5.2 Gy for 1-2 fractions or 2.5 Gy for 1-4 fractions                            | Not mentioned                 | 26Gy/5Fx/1w                                                | N/A                                                         | 72   | Local and regional recurrences | Recruiting |

|             |               |     |      |     |                                                                                  |                                                       |                                                                                           |                                                    |                                 |                                 |      |                      |            |
|-------------|---------------|-----|------|-----|----------------------------------------------------------------------------------|-------------------------------------------------------|-------------------------------------------------------------------------------------------|----------------------------------------------------|---------------------------------|---------------------------------|------|----------------------|------------|
|             |               |     |      |     | M0                                                                               |                                                       |                                                                                           |                                                    |                                 |                                 |      |                      |            |
| NCT04443413 | United States | ≥18 | 2020 | Yes | BCS or mastectomy; clinical or pathologic T1-T4c, N0-3, M0; indicated for RNI    | Not mentioned                                         | Optional Study group: SIB of 5-fraction; Control group: 4-fraction boost of x-ray therapy | Not mentioned                                      | proton therapy over 5 fractions | x-ray therapy over 25 fractions | 146  | Complication rate    | Recruiting |
| NCT04228991 | Canada        | ≥18 | 2021 | Yes | BCS or mastectomy; pT3N0, pT1-3N1-2; Or NAC with cT3N0, cT1-3N1-2 and ypT0-3N0-2 | No                                                    | Not mentioned                                                                             | Not mentioned                                      | 26Gy/5Fx/1w                     | 40Gy/15Fx/3w                    | 588  | Lymphedema           | Recruiting |
| NCT04472845 | India         | ≥18 | 2021 | Yes | BCS or mastectomy; pT3-4pN2-3 M0; NAC with clinical stage III or ypN+            | Tissue expanders with distant metal ports are allowed | Study group: SIB of 34Gy/5Fx or sequential 8Gy/2Fx/2d; Control group: SIB of              | for patients with T3-4 central and inner quadrants | 26Gy/5Fx/1w                     | 34Gy/10Fx/2w                    | 1018 | Locoregional control | Recruiting |

|             |        |     |      |     |                                                                       |               |                                                                                                               |                                |                                                            |                                                             |     |                                              |            |
|-------------|--------|-----|------|-----|-----------------------------------------------------------------------|---------------|---------------------------------------------------------------------------------------------------------------|--------------------------------|------------------------------------------------------------|-------------------------------------------------------------|-----|----------------------------------------------|------------|
|             |        |     |      |     |                                                                       |               | 42Gy/10fx/2w or sequential 8Gy/2Fx/2d                                                                         | t lesions and patients with N2 |                                                            |                                                             |     |                                              |            |
| NCT05150535 | Egypt  | ≥45 | 2021 | Yes | BCS or mastectomy; TxN1-3M0, T0-2N2-3M0, T3-4N0-3M0; Or LABC with NAC | Not mentioned | Study group: SIB of 32Gy/5Fx or sequential 12Gy/ 4Fx; Control group: SIB of 48Gy/15Fx, or sequential 12Gy/4Fx | For patients with N2-3         | 26Gy/5Fx/1w for WBI/Chest wall, and RNI in N+ or after NAC | 40Gy/15Fx/3w for WBI/Chest wall, and RNI in N+ or after NAC | 100 | Acute and chronic grade 2 toxicity or higher | Unknown    |
| NCT05665920 | Brazil | ≥18 | 2022 | Yes | BCS; pT1-3 and pN1-3a; with indication of RNI                         | N/A           | Not mentioned                                                                                                 | No                             | 26Gy/5Fx/1w                                                | 40Gy/15Fx/3w                                                | 36  | Locoregional recurrence                      | Recruiting |

Abbreviations: WBI = Whole Breast Irradiation; RNI = Regional Nodal Irradiation; IMNI = Internal Mammary Nodal Irradiation; N/A = Not Applicable; SIB = Simultaneous Integrated Boost; w = week; d = days; BCS = Breast-Conserving Surgery; LVSI = Lymphovascular Space Invasion; PBI = Partial Breast Irradiation; NAC = Neoadjuvant Chemotherapy; LABC = Locally Advanced Breast Cancer.
